# Supplementary material
Source: PubMed Central journal article supplement (PMC58561)

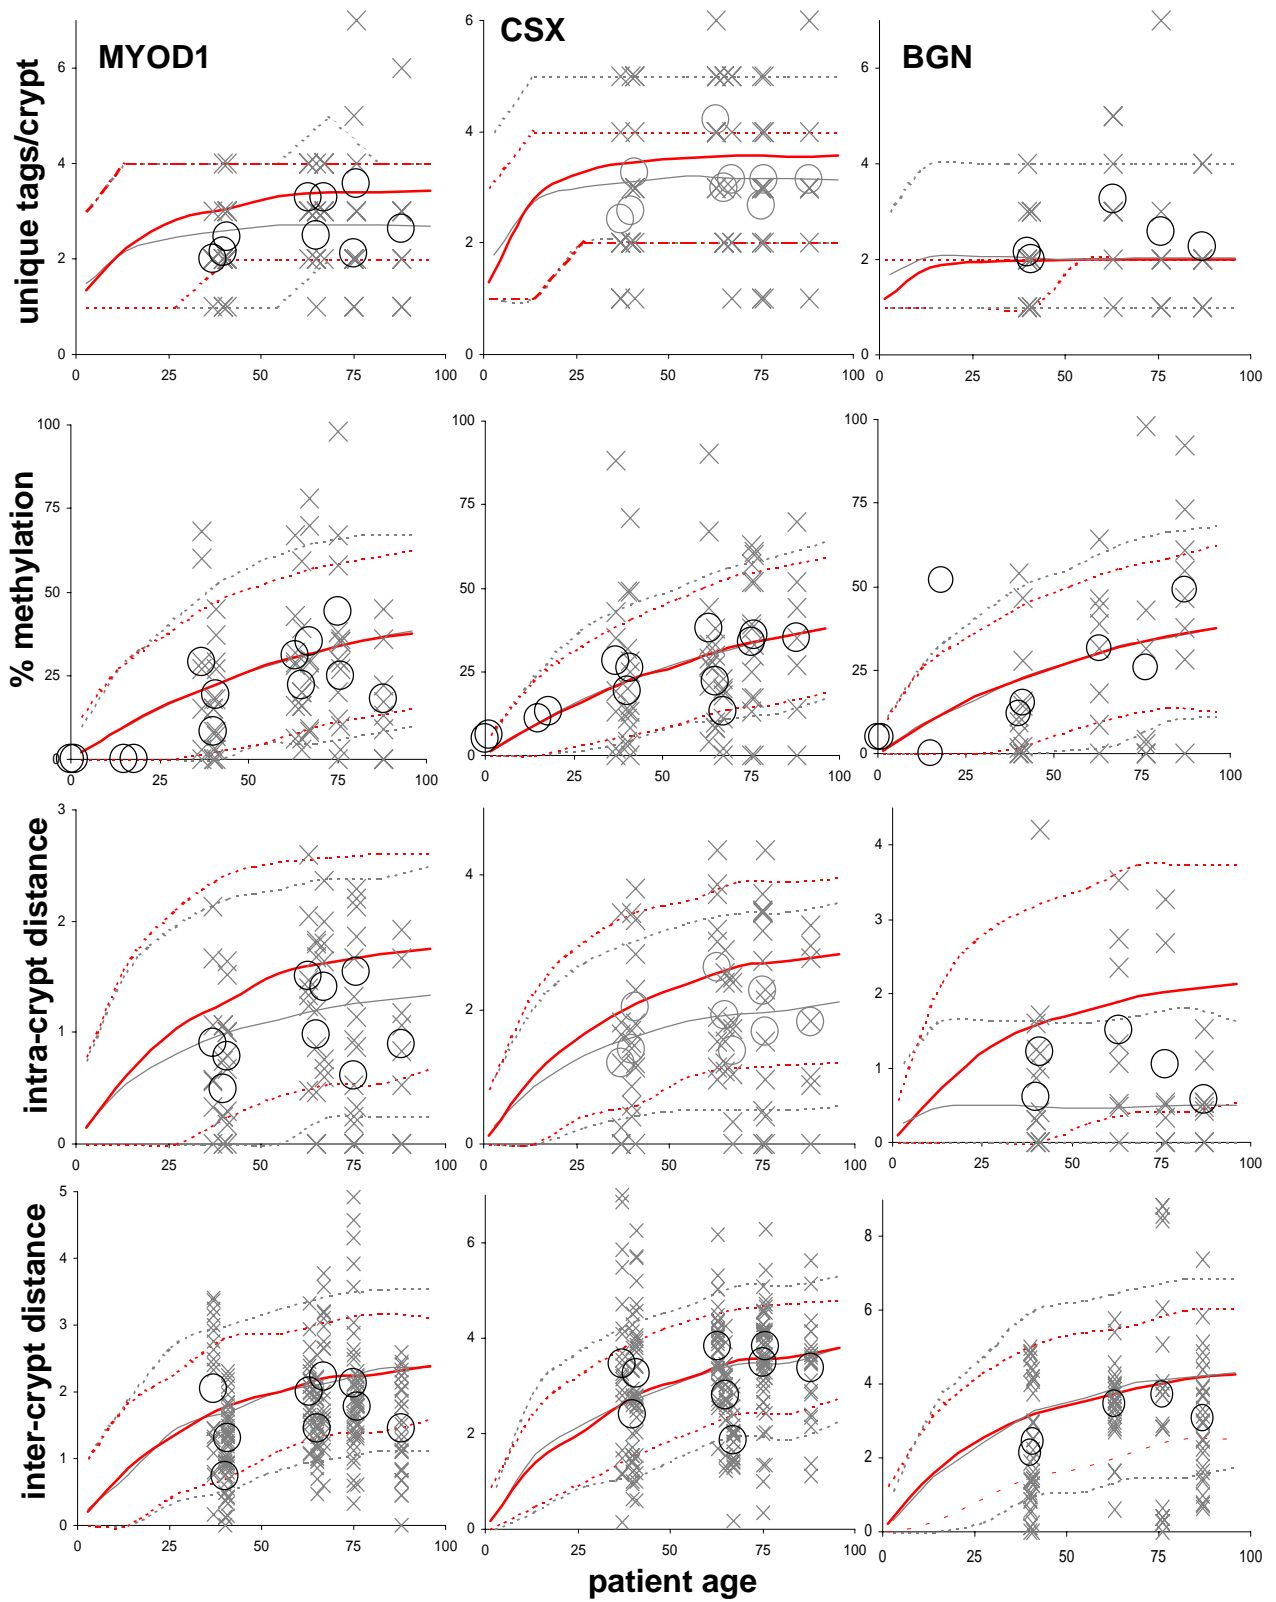

Figure 8

Supplement: pnas_191225998_4.pdf [file pnas_191225998_4.pdf]

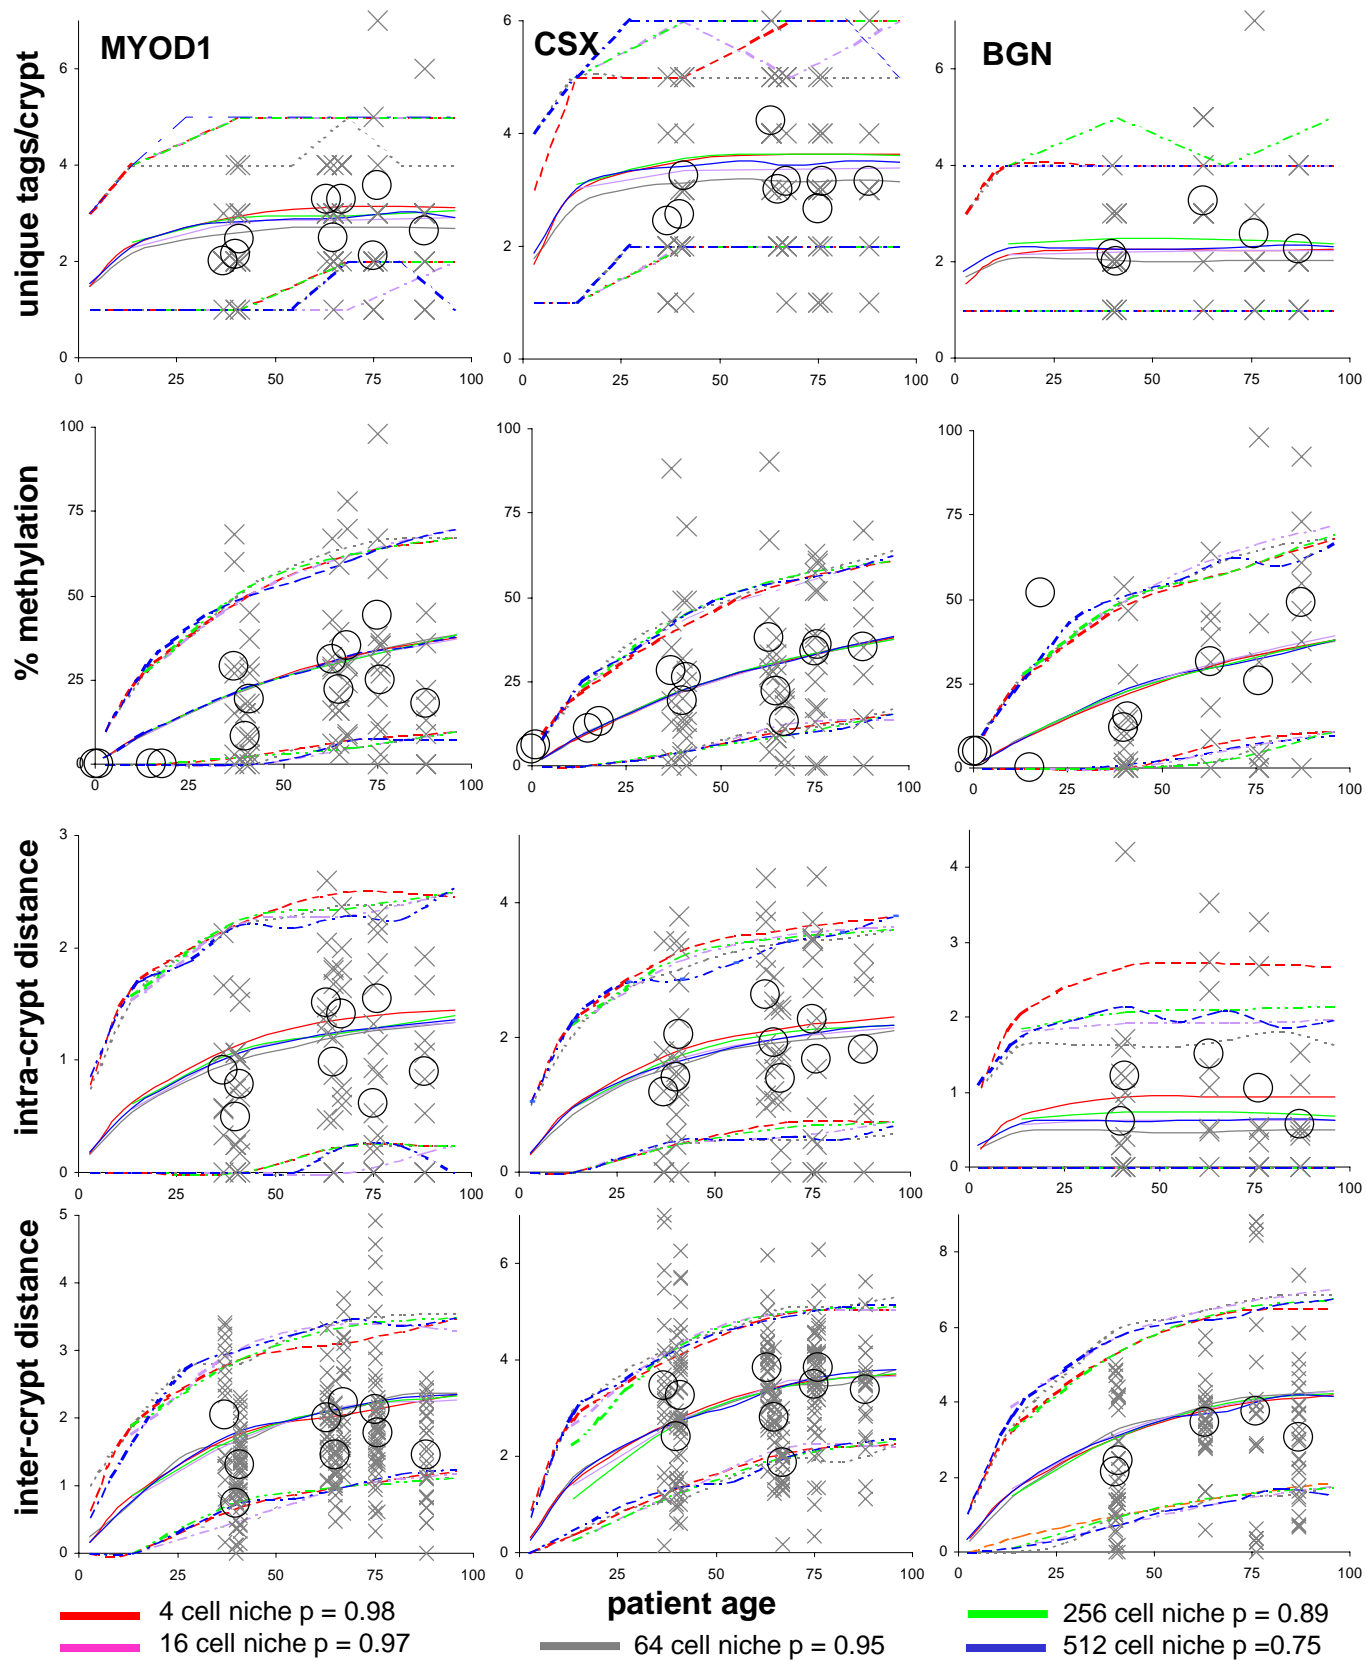

Figure 9

Supplement: pnas_191225998_5.pdf [file pnas_191225998_5.pdf]
